# Supplementary material
Source: PubMed Central journal article supplement (PMC1855879)
Supplement: jbacter_189_9_3515__1.pdf [file jbacter_189_9_3515__1.pdf]

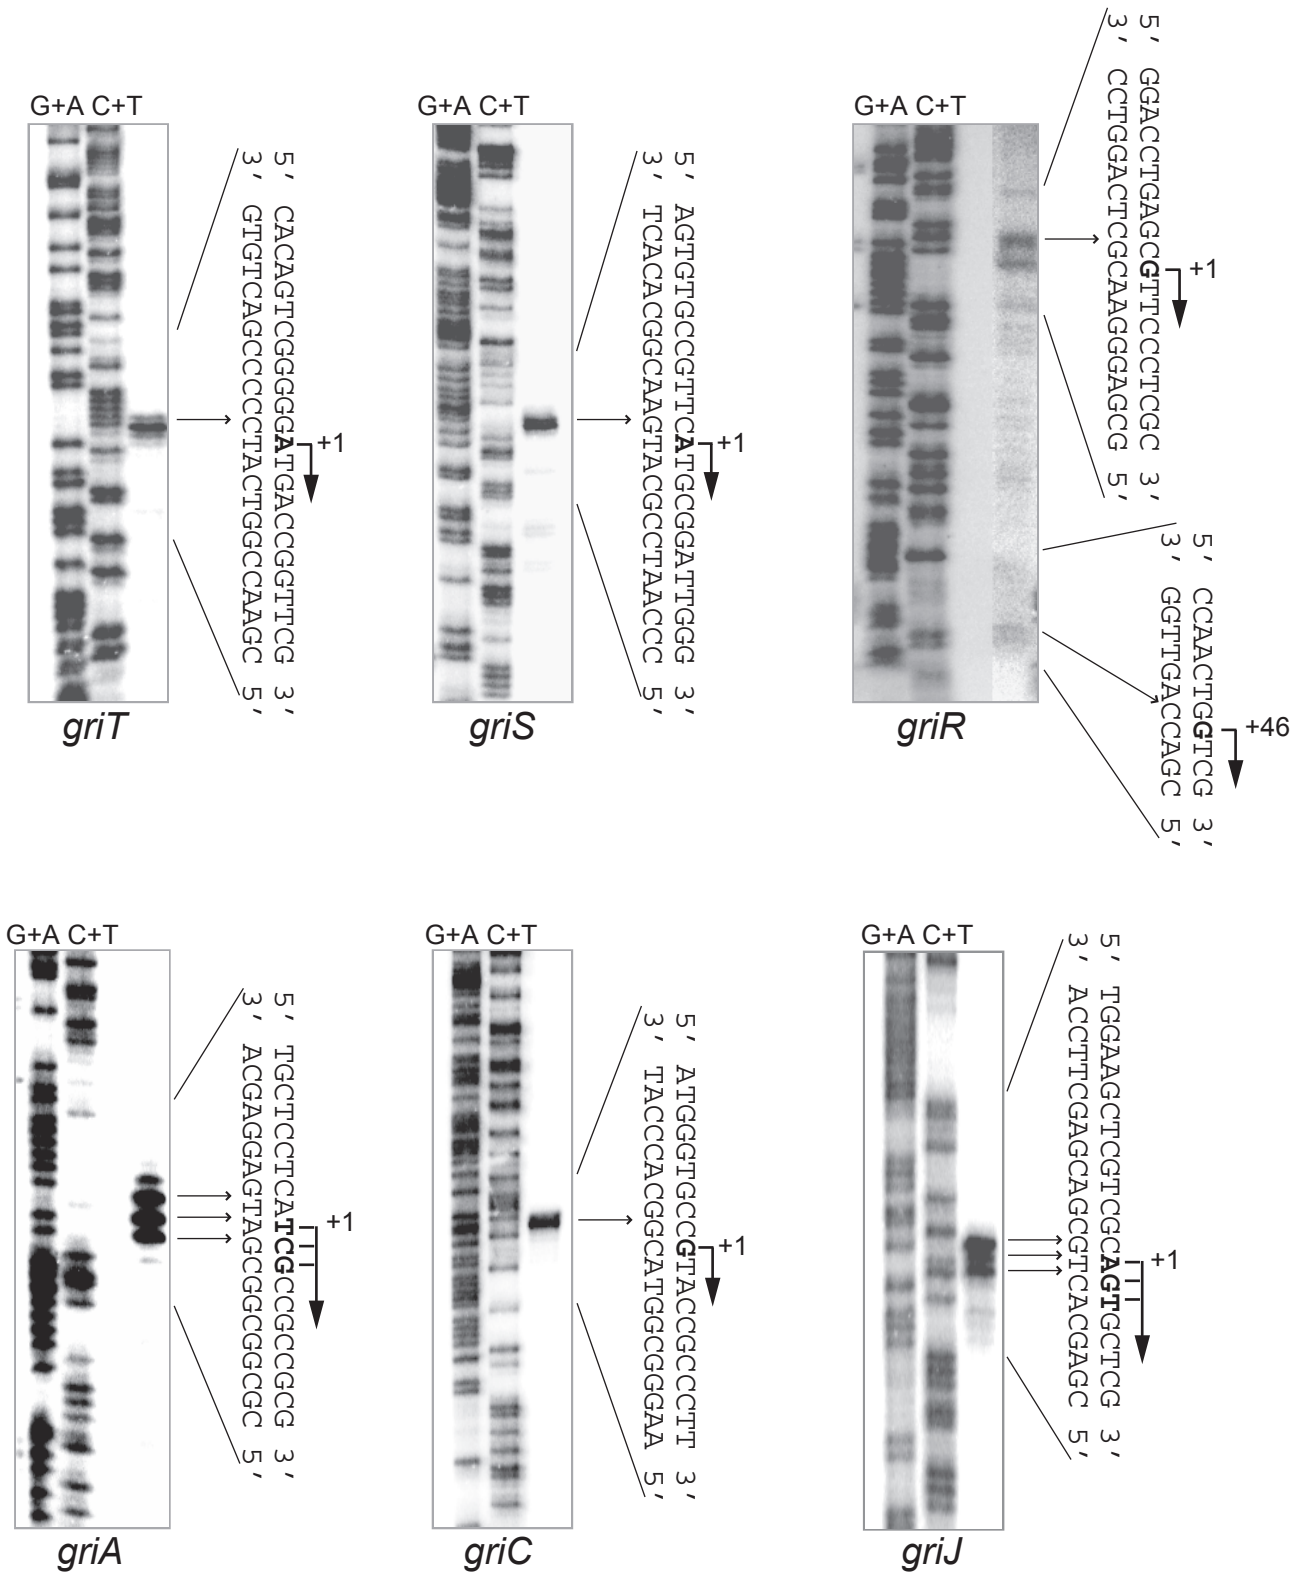

Fig. S1. High-resolution S1 nuclease mapping for determination of the transcriptional start points of *griT*, *griS*, *griR*, *griA*, *griC*, and *griJ*.
